# Supplementary material for: TFEB Promotes Prostate Cancer Progression via Regulating ABCA2-Dependent Lysosomal Biogenesis
Source: Frontiers journal article supplement (doi:10.3389/fonc.2021.632524), 2021-03-01
Supplement: Data_Sheet_1.pdf [file Data_Sheet_1.pdf]

## *Supplementary Material*

### **Supplementary Materials and Methods**

#### **Patients and tissue samples**

Two hundred and five consecutive patients with PCa who underwent radical prostatectomy at a single hospital from 1993 to 1995 were included in this study with the approval of the Institutional Review Board. Patients who received adjuvant or neoadjuvant hormonal or radiation treatment prior to cancer recurrence were excluded. All hematoxylin–eosin (H&E)-stained sections from each case were reviewed, and the Gleason score (GS) was reassigned based on the current grading recommendation from the International Society of Urological Pathology. The tissue microarray (TMA) manufacturing process was described earlier. Relevant clinicopathological data for each patient included age, preoperative PSA, GS, pathological T stage (pT), surgical margin (M), biochemical recurrence (BCR), postoperative metastasis and overall survival (OS). Postoperative BCR was defined as a post-nadir detectable serum PSA level of  $\geq 0.2$  ng/ml, followed by a confirmatory value. Metastasis was defined by the diagnosis of prostate cancer recurrence in a lymph node or at a distant site by clinical impression and radiographic evidence. Information on death was taken from death certificates and physician correspondence. The time intervals between initial surgery and different endpoints (BCR, metastasis and OS) were defined separately. The median follow-up time among all patients was 16.4 years (IQR 14.4–19.4). During the follow-up period, 40.5% of patients had BCR, 13.2% of patients developed metastases, and 27.8% of patients died from all causes.

#### **Real-time PCR**

All genes primers were designed by Oligo 7 software (v7.56). Those primers were evaluated with high scores using Oligo 7 software and would be choose in this study. List of human primers for RT-PCR.

| Gene Name | Primer Sequence         |
|-----------|-------------------------|
| TFEB F    | CAGATGCCCAACACGCTACC    |
| TFEB R    | TGTCTTTCTTCTGCCGCTCC    |
| ABCA2 F   | AGAAGTGCATCGCGTCCCTC    |
| ABCA2 R   | GCCACCTCATACAGCGCGAAG   |
| CALR F    | ATCAACAAGGACATCCGTTGC   |
| CALR R    | CTCATCCCAGTCTTCCGGTT    |
| DGAT2 F   | CGGGACACCATAGACTATTTGCT |
| DGAT2 R   | GCCCTCCTCGAAGATCACCT    |
| FKBP10 F  | TCCAGCTACTCCCGCAACCAC   |
| FKBP10 R  | ATGGTAATTCTCCGGCGTTCCC  |
| SIGMAR1 F | CCTTCTGCACGCTCGCTGTCC   |
| SIGMAR1 R | ACCTCACTTTTGGTGGTGCCCTC |
| GAA F     | GCTACTCCTCCACCGCTATCACC |

|            |                         |
|------------|-------------------------|
| GAA R      | CCATGTAGTCCAGGTCGTTCCAC |
| GPX4 F     | TGGCCTTCCCGTGTAACCAGT   |
| GPX4 R     | CCCGTTCACGCAGATCTTGCT   |
| PSAP F     | CCATTAAGAAGCACGAGGTCCC  |
| PSAP R     | CCTCCTGGCACTCTTCCGAC    |
| CLIC4 F    | ACGTAAATTTCTGGATGGCAA   |
| CLIC4 R    | GTATTGGTGAACTCGTCCCT    |
| MAP1B F    | GTCCCCTTCTCAGGAATTCGT   |
| MAP1B R    | CCTTCAGAAAATCCGTTGAGC   |
| TAOK1 F    | AGTGCCTTATATCACATAGCC   |
| TAOK1 R    | AGTTGCGAAAATAATCAGACCA  |
| TEAD1 F    | TGCCAACCATTCTTACAGTGACC |
| TEAD1 R    | CAGCCCAGAAATTTTACGAGGA  |
| ACTB F     | ACCCTGAAGTACCCCATCGAG   |
| ACTB R     | AGCACAGCCTGGATAGCAAC    |
| GAPDH F    | ACAGCCTCAAGATCATCAGC    |
| GAPDH R    | GGTCATGAGTCCTTCCACGAT   |
| ATP6V1A F  | GTA CTTCGCACTGGTAAACCC  |
| ATP6V1A R  | AGTGATATGACTACCAACCCGTA |
| ATP6V1H F  | ATGACCAAAAATGGATATCCGA  |
| ATP6V1H R  | CAAAGAAAATGCTAACACGCTGA |
| CTSA F     | TGGGCTTCTCCTACTCCGAT    |
| CTSA R     | CAGCATAGCTCTCCCCGGTCA   |
| CTSB F     | ATGTAGGGTGCAGACCGTACT   |
| CTSB R     | GTGTGCCATTCTCCACTCCC    |
| CTSD F     | CGCTGCACAAGTTCACGTCCA   |
| CTSD R     | CCCGATGCCAATCTCCCCGTA   |
| CTSF F     | AGCCCAAGTCAGCCTTCACTC   |
| CTSF R     | AGCCATCTTCACAGGCAAGTCC  |
| LAMP1 F    | CACTTCTGACCCCAGTCTCG    |
| LAMP1 R    | TCACGTTGTTTCATGTGGACCT  |
| CLCN7 F    | CCATGATCTCCACGTTACCCT   |
| CLCN7 R    | CCAGCACGGCCTCAATCACC    |
| MCOLN1 F   | CCGCTCACTCCTTCGAGGCTT   |
| MCOLN1 R   | ACCCACACCAGCAGCGTCGAG   |
| VPS11 F    | CTGCTCAGCCCTAAGTGACC    |
| VPS11 R    | ACATCCTCAAAGACGGTGCT    |
| VPS18 F    | CAAGGCAAATGAGCCCAACCAC  |
| VPS18 R    | CCCAGTGCCTTGTTCCAACCC   |
| ABCA2 P1 F | ACAAGCCCGAGCAACATAGCG   |
| ABCA2 P1 R | GCCTCAGCCCTCCAAGTAGC    |

|            |                        |
|------------|------------------------|
| ABCA2 P2 F | AGCTGGATACCATTGACAACGC |
| ABCA2 P2 R | CCACCGCTCACCTTGGACA    |
