# Supplementary material for: TFEB Promotes Prostate Cancer Progression via Regulating ABCA2-Dependent Lysosomal Biogenesis
Source: Frontiers journal article supplement (doi:10.3389/fonc.2021.632524), 2021-03-01
Supplement: Data_Sheet_3.pdf [file Data_Sheet_3.pdf]

## *Supplementary Figure 2*

### **Supplementary Figure 2**

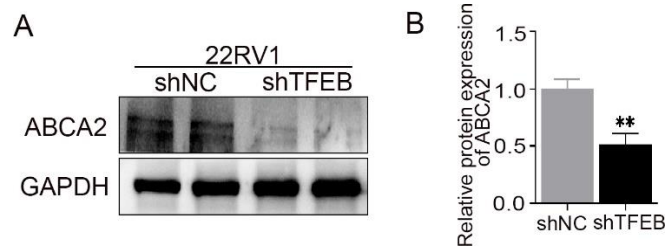

### **Legends**

#### **Supplementary Figure 2. Knockdown TFEB**

**(A)** Western-blot verification of ABCA2 gene in TFEB knockdown cell lines.

**(B)** Quantitative analysis of the western-blot.
